# Supplementary material for: Prediction of solubility of two-component molecular crystals
Source: Royal Society of Chemistry journal article supplement (doi:10.1039/d2ce00105e), 2022-01-01
Supplement: d2ce00105e1.pdf [file d2ce00105e1.pdf]

# Supporting Information

for publication

## Prediction of solubility of two-component molecular crystals

*German L. Perlovich*

G.A. Krestov Institute of Solution Chemistry of the Russian Academy of Sciences, 1

Akademicheskaya St., Ivanovo, 153045, Russian Federation

Corresponding author: [glp@isc-ras.ru](mailto:glp@isc-ras.ru)

**Table S1.** Calculated,  $X_{Cal}^{CC}$ , and experimental,  $X_{Exp}^{CC}$ , solubility values of two-component molecular crystals with stoichiometry 1:1 in the solvents at different temperatures

| CF1                | CF2                 | T [°C] | Solvent                | pH  | $\ln X_{id}^{CF1}$ | $\ln X_{id}^{CF2}$ | $\ln X_{id}^{CC}$ | Unit <sup>d</sup> | $X^{CF1}$<br>[Unit] | $X^{CF2}$<br>[Unit] | $\gamma(CF1)$ | $\gamma(CF2)$ | $X_{cal}^{CC}$<br>[mol fr] | $X_{exp}^{CC}$<br>[mol fr] | Ref  |
|--------------------|---------------------|--------|------------------------|-----|--------------------|--------------------|-------------------|-------------------|---------------------|---------------------|---------------|---------------|----------------------------|----------------------------|------|
| Carbamazepine      | Nicotinamide        | 25.0   | Buffer                 | 6.0 | -2.94              | -2.15              | -2.87             | mol/L             | 4.60E-04            | 7.50E+00            | 6.35E+03      | 1.89E-01      | 8.17E-04                   | 1.27E-03                   | [1]  |
| Carbamazepine      | Saccharin           | 25.0   | Buffer                 | 2.0 | -2.94              | -4.01              | -3.03             | mol/L             | 4.60E-04            | 1.80E-02            | 6.35E+03      | 5.56E+01      | 4.06E-05                   | 2.13E-05                   | [1]  |
| Carbamazepine      | Salicylic Acid      | 25.0   | Buffer                 | 2.9 | -2.94              | -2.82              | -2.55             | mol/L             | 4.60E-04            | 1.40E-02            | 6.35E+03      | 2.36E+02      | 3.18E-05                   | 1.63E-05                   | [1]  |
| Benzamide          | dibenzyl sulfoxide  | 37.0   | Water                  |     | -1.72              | -2.46              | -1.97             | mol/L             | 1.08E-01            | 1.43E-03            | 9.08E+01      | 3.32E+03      | 1.27E-04                   | 9.59E-05                   | [2]  |
| Paracetamol        | Theophylline        | 37.0   | Water                  |     | -2.73              | -3.77              | -1.76             | mol/L             | 1.39E-01            | 6.09E-02            | 2.55E+01      | 2.08E+01      | 3.73E-03                   | 3.51E-03                   | [3]  |
| Drug 1             | Benzoic Acid        | 25.0   | 67THF-33H <sup>b</sup> |     | -4.85              | -1.48              | -2.71             | mol/L             | 1.67E-02            | 2.18E+00            | 4.71E+00      | 9.40E-01      | 1.59E-02                   | 3.55E-02                   | [4]  |
| Diflunisal         | Theophylline        | 25.0   | Buffer                 | 7.4 | -4.34              | -3.94              | -3.47             | mol/L             | 1.50E-02            | 3.10E-02            | 4.80E+01      | 3.48E+01      | 3.80E-04                   | 6.34E-04                   | [5]  |
| Diclofenac         | Theophylline        | 25.0   | Buffer                 | 7.4 | -4.54              | -3.94              | -4.00             | mol/L             | 5.00E-03            | 3.10E-02            | 1.18E+02      | 3.48E+01      | 1.42E-04                   | 1.44E-04                   | [5]  |
| Theophylline       | Salicylic acid      | 25.0   | Buffer                 | 2.6 | -3.95              | -2.80              | -2.64             | mol/L             | 3.10E-02            | 1.40E-02            | 3.45E+01      | 2.41E+02      | 3.91E-04                   | 2.28E-04                   | [6]  |
| Indomethacin       | Saccharine          | 25.0   | MeOH                   |     | -4.00              | -3.34              | -4.36             | mol/L             | 5.15E-02            | 2.77E-01            | 8.64E+00      | 2.99E+00      | 1.25E-03                   | 2.38E-03                   | [7]  |
| Bicalutamide       | Benzamide           | 25.0   | Chloroform             |     | -5.88              | -1.99              | -3.34             | mol/L             | 6.70E-03            | 2.10E-01            | 5.17E+00      | 8.09E+00      | 2.74E-03                   | 1.52E-03                   | [8]  |
| Bicalutamide       | Salicylamide        | 25.0   | Chloroform             |     | -5.88              | -2.77              | -3.73             | mol/L             | 6.70E-03            | 4.90E-02            | 5.17E+00      | 1.58E+01      | 1.32E-03                   | 9.43E-04                   | [8]  |
| Vanillin isoniazid | Saccharin           | 25.0   | Water                  |     | -6.20              | -3.77              | -4.20             | mol/L             | 6.90E-05            | 1.70E-02            | 1.63E+03      | 7.51E+01      | 2.14E-05                   | 1.51E-05                   | [9]  |
| Salinazid          | Saccharin           | 25.0   | Water                  |     | -5.49              | -3.77              | -3.78             | mol/L             | 5.70E-05            | 1.70E-02            | 4.04E+03      | 7.51E+01      | 2.08E-05                   | 2.03E-05                   | [9]  |
| TDZ <sup>a</sup>   | Vanillic Acid       | 25.0   | Buffer                 | 2.0 | -2.80              | -4.10              | -3.34             | mol/L             | 3.70E-04            | 9.02E-03            | 9.13E+03      | 1.02E+02      | 1.84E-05                   | 1.13E-05                   | [10] |
| Caffeine           | Gallic Acid         | 30.0   | Water                  |     | -2.17              | -8.34              | -5.99             | mol fr            | 2.54E-03            | 1.76E-03            | 4.49E+01      | 1.35E-01      | 5.06E-04                   | 1.90E-04                   | [11] |
| Sulfathiazole      | Theophylline        | 25.0   | Water                  |     | -3.23              | -3.95              | -4.57             | mol/L             | 1.80E-03            | 2.50E-02            | 1.22E+03      | 4.25E+01      | 2.27E-05                   | 3.24E-05                   | [12] |
| Flurbiprofen       | Benzamide           | 25.0   | Buffer                 | 2.0 | -2.26              | -1.99              | -1.97             | mol/L             | 4.53E-05            | 1.02E-01            | 1.28E+05      | 7.37E+01      | 2.26E-05                   | 1.69E-05                   | [13] |
| Flurbiprofen       | Picolinamide        | 25.0   | Buffer                 | 2.0 | -2.26              | -1.50              | -1.42             | mol/L             | 4.53E-05            | 6.10E-01            | 1.28E+05      | 1.90E+01      | 7.80E-05                   | 5.76E-05                   | [13] |
| Flurbiprofen       | Salicylamide        | 25.0   | Buffer                 | 2.0 | -2.26              | -2.77              | -2.39             | mol/L             | 4.53E-05            | 1.88E-02            | 1.28E+05      | 1.84E+02      | 9.47E-06                   | 7.92E-06                   | [13] |
| Diclofenac         | L-proline           | 25.0   | Buffer                 | 6.8 | -4.54              | -1.65              | -2.58             | mol/L             | 1.17E-03            | 6.98E-01            | 5.06E+02      | 1.43E+01      | 4.46E-04                   | 5.23E-04                   | [14] |
| Niflumic Acid      | L-proline           | 25.0   | Buffer                 | 6.8 | -4.32              | -1.65              | -3.22             | mol/L             | 5.45E-03            | 5.37E+00            | 1.36E+02      | 9.49E-01      | 1.77E-03                   | 8.99E-04                   | [14] |
| Clonixin           | L-proline           | 25.0   | Buffer                 | 6.8 | -4.38              | -1.65              | -3.14             | mol/L             | 2.40E-03            | 5.37E+00            | 2.89E+02      | 9.49E-01      | 1.31E-03                   | 8.99E-04                   | [14] |
| Paracetamol        | Maleic Acid         | 25.0   | Acetonitrile           |     | -3.04              | -2.54              | -2.59             | mol/L             | 1.50E-01            | 4.40E-01            | 5.90E+00      | 3.25E+00      | 8.53E-03                   | 2.56E-02                   | [15] |
| Fluconazole        | 4-OH-Benzoic acid   | 25.0   | MeOH                   |     | -3.32              | -3.67              | -2.97             | mol/L             | 3.10E-01            | 2.05E+00            | 2.54E+00      | 2.24E-01      | 3.41E-02                   | 1.93E-02                   | [16] |
| Fluconazole        | Vanillic acid       | 25.0   | MeOH                   |     | -3.32              | -4.12              | -3.26             | mol/L             | 3.10E-01            | 2.23E+00            | 2.54E+00      | 1.11E-01      | 3.63E-02                   | 1.76E-02                   | [16] |
| Sulfadimidine      | 3-Me-Salicylic acid | 30.0   | Acetonitrile           |     | -4.06              | -2.58              | -3.02             | mol fr            | 3.18E-03            | 2.04E-02            | 5.45E+00      | 3.70E+00      | 4.89E-02                   | 8.72E-02                   | [17] |
| Flurbiprofen       | Benzamide           | 25.0   | Buffer                 | 6.8 | -2.26              | -1.99              | -1.97             | mol/L             | 7.89E-03            | 1.02E-01            | 7.31E+02      | 7.37E+01      | 2.99E-04                   | 2.53E-04                   | [13] |
| Flurbiprofen       | Picolinamide        | 25.0   | Buffer                 | 6.8 | -2.26              | -1.50              | -1.42             | mol/L             | 7.90E-03            | 6.10E-01            | 7.30E+02      | 1.90E+01      | 1.03E-03                   | 5.61E-04                   | [13] |
| Flurbiprofen       | Salicylamide        | 25.0   | Buffer                 | 6.8 | -2.26              | -2.77              | -2.39             | mol/L             | 7.90E-03            | 1.88E-02            | 7.31E+02      | 1.84E+02      | 1.25E-04                   | 1.19E-04                   | [13] |
| Arbidol            | Benzoic Acid        | 20.0   | EtOAc                  |     | -4.12              | -1.70              | -2.87             | mol/L             | 4.40E-03            | 1.44E+00            | 3.77E+01      | 1.22E+00      | 4.16E-03                   | 4.34E-03                   | [18] |
| Arbidol            | Saicylic Acid       | 20.0   | EtOH                   |     | -4.12              | -2.93              | -3.39             | mol/L             | 3.30E-03            | 1.91E+00            | 8.42E+01      | 3.73E-01      | 3.00E-03                   | 8.80E-04                   | [18] |
| Fluconazole        | Vanillic acid       | 25.0   | Water                  |     | -3.32              | -4.12              | -3.26             | mol/L             | 1.60E-02            | 9.10E-03            | 1.25E+02      | 9.87E+01      | 1.73E-04                   | 1.20E-04                   | [16] |
| Indomethacin       | Saccharine          | 25.0   | EtOH                   |     | -4.00              | -3.34              | -4.36             | mol/L             | 6.18E-02            | 1.79E-01            | 5.08E+00      | 3.35E+00      | 1.54E-03                   | 2.31E-03                   | [7]  |
| Indomethacin       | Saccharine          | 25.0   | Water                  |     | -4.00              | -3.34              | -4.36             | mol/L             | 8.38E-06            | 1.88E-02            | 1.22E+05      | 1.04E+02      | 1.79E-06                   | 9.32E-07                   | [7]  |
| Theophylline       | Salicylic acid      | 30.0   | Acetonitrile           |     | -3.84              | -2.67              | -2.54             | mol fr            | 5.40E-04            | 3.44E-02            | 3.99E+01      | 2.00E+00      | 4.40E-03                   | 5.77E-03                   | [6]  |
| Carbamazepine      | Glutaric acid       | 25.0   | Isopropyl              |     | -2.94              | -1.46              | -2.04             | mol/L             | 5.00E-02            | 3.60E+00            | 1.36E+01      | 5.62E-01      | 2.36E-02                   | 2.46E-02                   | [1]  |
| Carbamazepine      | Glutaric acid       | 25.0   | EtOH                   |     | -2.94              | -1.46              | -2.04             | mol/L             | 1.40E-01            | 2.80E+00            | 6.22E+00      | 9.83E-01      | 2.63E-02                   | 1.89E-02                   | [1]  |
| Carbamazepine      | Glutaric acid       | 25.0   | EtOAc                  |     | -2.94              | -1.46              | -2.04             | mol/L             | 4.90E-02            | 1.00E+00            | 1.09E+01      | 2.25E+00      | 1.31E-02                   | 9.31E-03                   | [1]  |
| Carbamazepine      | Nicotinamide        | 25.0   | Isopropyl              |     | -2.94              | -2.15              | -2.87             | mol/L             | 5.00E-02            | 6.30E-01            | 1.36E+01      | 2.30E+00      | 5.07E-03                   | 4.70E-03                   | [1]  |
| Carbamazepine      | Nicotinamide        | 25.0   | EtOH                   |     | -2.94              | -2.15              | -2.87             | mol/L             | 2.45E-02            | 8.21E-02            | 6.22E+00      | 1.62E+00      | 8.91E-03                   | 8.88E-03                   | [1]  |
| Carbamazepine      | Nicotinamide        | 25.0   | EtOAc                  |     | -2.94              | -2.15              | -2.87             | mol/L             | 4.90E-02            | 1.10E-01            | 1.09E+01      | 1.08E+01      | 2.54E-03                   | 2.54E-03                   | [1]  |

|               |                     |      |                        |  |       |       |       |        |          |          |          |          |          |          |      |
|---------------|---------------------|------|------------------------|--|-------|-------|-------|--------|----------|----------|----------|----------|----------|----------|------|
| Carbamazepine | Saccharin           | 25.0 | Isopropyl              |  | -2.94 | -4.01 | -3.03 | mol/L  | 5.00E-02 | 1.60E-02 | 1.36E+01 | 1.47E+01 | 1.70E-03 | 1.52E-03 | [1]  |
| Carbamazepine | Saccharin           | 25.0 | EtOH                   |  | -2.94 | -4.01 | -3.03 | mol/L  | 1.40E-01 | 2.40E-01 | 6.22E+00 | 1.24E+00 | 8.69E-03 | 3.83E-03 | [1]  |
| Carbamazepine | Saccharin           | 25.0 | EtOAc                  |  | -2.94 | -4.01 | -3.03 | mol/L  | 4.90E-02 | 1.80E-01 | 1.09E+01 | 1.01E+00 | 7.27E-03 | 4.92E-03 | [1]  |
| Drug 1        | Benzoic Acid        | 25.0 | 25THF-75H <sup>c</sup> |  | -4.85 | -1.48 | -2.71 | mol/L  | 5.30E-04 | 7.28E-01 | 1.16E+02 | 2.39E+00 | 2.00E-03 | 3.73E-03 | [4]  |
| Caffeine      | Gallic Acid         | 35.0 | Water                  |  | -2.10 | -8.10 | -5.81 | mol fr | 3.14E-03 | 2.03E-03 | 3.89E+01 | 1.50E-01 | 6.23E-04 | 2.50E-04 | [11] |
| Caffeine      | Gallic Acid         | 40.0 | Water                  |  | -2.04 | -7.86 | -5.62 | mol fr | 4.14E-03 | 2.48E-03 | 3.15E+01 | 1.55E-01 | 8.15E-04 | 3.80E-04 | [11] |
| Caffeine      | Gallic Acid         | 45.0 | Water                  |  | -1.97 | -7.63 | -5.45 | mol fr | 5.19E-03 | 3.11E-03 | 2.69E+01 | 1.56E-01 | 1.05E-03 | 5.80E-04 | [11] |
| Caffeine      | Gallic Acid         | 50.0 | Water                  |  | -1.91 | -7.40 | -5.27 | mol fr | 7.93E-03 | 4.33E-03 | 1.88E+01 | 1.41E-01 | 1.58E-03 | 7.70E-04 | [11] |
| Caffeine      | Gallic Acid         | 55.0 | Water                  |  | -1.84 | -7.17 | -5.09 | mol fr | 9.57E-03 | 5.57E-03 | 1.66E+01 | 1.38E-01 | 2.03E-03 | 9.90E-04 | [11] |
| Sulfathiazole | Theophylline        | 15.0 | Water                  |  | -3.47 | -4.18 | -4.87 | mol/L  | 1.00E-03 | 1.70E-02 | 1.73E+03 | 5.01E+01 | 1.30E-05 | 1.80E-05 | [12] |
| Sulfathiazole | Theophylline        | 40.0 | Water                  |  | -2.89 | -3.63 | -4.14 | mol/L  | 2.50E-03 | 4.00E-02 | 1.23E+03 | 3.64E+01 | 3.76E-05 | 4.14E-05 | [12] |
| Sulfathiazole | Theophylline        | 60.0 | Water                  |  | -2.46 | -3.23 | -3.59 | mol/L  | 9.00E-03 | 1.30E-01 | 5.25E+02 | 1.65E+01 | 1.48E-04 | 1.26E-04 | [12] |
| Sulfadimidine | 3-Me-Salicylic acid | 30.0 | MeOH                   |  | -4.06 | -2.58 | -3.02 | mol fr | 2.68E-03 | 1.86E-01 | 6.45E+00 | 4.06E-01 | 6.83E-02 | 1.45E-01 | [17] |
| Bicalutamide  | Benzamide           | 18.0 | Chloroform             |  | -6.19 | -2.15 | -3.60 | mol/L  | 5.60E-03 | 1.60E-01 | 4.53E+00 | 9.05E+00 | 2.14E-03 | 1.12E-03 | [8]  |
| Bicalutamide  | Benzamide           | 22.0 | Chloroform             |  | -6.01 | -2.06 | -3.45 | mol/L  | 6.20E-03 | 1.90E-01 | 4.89E+00 | 8.35E+00 | 2.49E-03 | 1.34E-03 | [8]  |
| Bicalutamide  | Benzamide           | 30.0 | Chloroform             |  | -5.66 | -1.88 | -3.16 | mol/L  | 7.70E-03 | 2.40E-01 | 5.60E+00 | 7.91E+00 | 3.19E-03 | 1.86E-03 | [8]  |
| Bicalutamide  | Salicylamide        | 18.0 | Chloroform             |  | -6.19 | -2.97 | -3.98 | mol/L  | 5.60E-03 | 3.80E-02 | 4.53E+00 | 1.67E+01 | 1.08E-03 | 7.09E-04 | [8]  |
| Bicalutamide  | Salicylamide        | 22.0 | Chloroform             |  | -6.01 | -2.86 | -3.84 | mol/L  | 6.20E-03 | 4.40E-02 | 4.89E+00 | 1.62E+01 | 1.21E-03 | 8.70E-04 | [8]  |
| Bicalutamide  | Salicylamide        | 30.0 | Chloroform             |  | -5.66 | -2.63 | -3.56 | mol/L  | 7.70E-03 | 6.00E-02 | 5.60E+00 | 1.49E+01 | 1.55E-03 | 1.15E-03 | [8]  |
| Arbidol       | Benzoic Acid        | 25.0 | EtOAc                  |  | -3.89 | -1.61 | -2.71 | mol/L  | 5.50E-03 | 1.70E+00 | 3.79E+01 | 1.13E+00 | 5.14E-03 | 5.54E-03 | [8]  |
| Arbidol       | Benzoic Acid        | 30.0 | EtOAc                  |  | -3.67 | -1.51 | -2.55 | mol/L  | 6.80E-03 | 1.97E+00 | 3.83E+01 | 1.06E+00 | 6.12E-03 | 7.05E-03 | [18] |
| Arbidol       | Benzoic Acid        | 35.0 | EtOAc                  |  | -3.45 | -1.42 | -2.40 | mol/L  | 8.60E-03 | 2.26E+00 | 3.77E+01 | 1.00E+00 | 7.42E-03 | 9.29E-03 | [18] |
| Arbidol       | Saicylic Acid       | 25.0 | EtOH                   |  | -3.89 | -2.80 | -3.23 | mol/L  | 4.50E-03 | 2.08E+00 | 7.75E+01 | 3.80E-01 | 3.63E-03 | 1.12E-03 | [18] |
| Arbidol       | Saicylic Acid       | 30.0 | EtOH                   |  | -3.67 | -2.67 | -3.08 | mol/L  | 5.60E-03 | 2.24E+00 | 7.79E+01 | 3.90E-01 | 4.17E-03 | 1.41E-03 | [18] |
| Arbidol       | Saicylic Acid       | 35.0 | EtOH                   |  | -3.45 | -2.55 | -2.93 | mol/L  | 7.60E-03 | 2.42E+00 | 7.15E+01 | 3.97E-01 | 5.03E-03 | 1.77E-03 | [18] |
| Et-Paraben    | Nicotinamide        | 25.0 | EtOH                   |  | -2.17 | -2.15 | -1.80 | mol/L  | 1.91E+00 | 8.21E-02 | 7.50E-01 | 2.47E+01 | 1.92E-02 | 3.81E-02 | [19] |

<sup>a</sup>TDZ - (1-[5-(3-Chloro-phenylamino)-1,2,4-thiadiazol-3-yl]-propan-2-ol)

<sup>b</sup>67THF-33H - 67%(V/V) THF +33% Heptane

<sup>c</sup>25THF-75H - 25%(V/V) THF +75% Heptane

<sup>d</sup> Unit corresponds to next two columns  $X^{CF1}$  and  $X^{CF2}$

**Table S2.** Coefficients of the correlation equation  $\ln(X_{id}(CC)) = C + D \cdot \ln(X_{id}(CF1))$  for the clusters including the considered compound as one of the components of the two-component crystal

| CF1                             | CF1:CF2 | C              | D (slope)     | R <sup>a</sup> | $\sigma^b$ | n <sup>c</sup> | $T_m(CF1)$<br>[°C] | $H_{fus}^{Tm}(CF1)$<br>[kJ/mol] |
|---------------------------------|---------|----------------|---------------|----------------|------------|----------------|--------------------|---------------------------------|
| Benzoic Acid                    | 1:1     | 0.016 ± 0.331  | 0.508 ± 0.057 | 0.9424         | 0.546      | 12             | 122.4              | 18.6                            |
| Caffeine                        | 1:1     | -0.930 ± 0.256 | 0.429 ± 0.027 | 0.9810         | 0.662      | 12             | 236.0              | 19.3                            |
| Carbamazepine                   | 1:1     | -2.109 ± 0.322 | 0.327 ± 0.089 | 0.8315         | 0.297      | 8              | 192.1              | 25.6                            |
| Fumaric Acid                    | 1:2     | 2.193 ± 0.430  | 1.209 ± 0.093 | 0.9855         | 0.262      | 7              | 287.0              | 31.8                            |
| Isoniazid                       | 1:1     | 0.102 ± 0.331  | 0.774 ± 0.061 | 0.9818         | 0.496      | 8              | 170.5              | 28.30                           |
| Isonicotinamide                 | 1:1     | -1.449 ± 0.334 | 0.368 ± 0.083 | 0.8433         | 0.565      | 10             | 156.0              | 24.5                            |
| Nicotinamide                    | 1:1     | -0.602 ± 0.301 | 0.519 ± 0.066 | 0.8851         | 0.634      | 19             | 128.5              | 24.1                            |
| Oxalic Acid                     | 1:2     | 1.162 ± 1.638  | 1.135 ± 0.459 | 0.7418         | 0.584      | 7              | 189.0              | 59.7                            |
| 4-NH <sub>2</sub> -Benzoic Acid | 1:1     | -1.596 ± 0.418 | 0.503 ± 0.115 | 0.8899         | 0.572      | 7              | 188.5              | 25.0                            |
| Saccharin                       | 1:1     | -2.226 ± 0.181 | 0.374 ± 0.033 | 0.9768         | 0.163      | 8              | 227.9              | 26.8                            |
| Salicylic Acid                  | 1:1     | -0.557 ± 0.313 | 0.513 ± 0.080 | 0.9052         | 0.319      | 11             | 160.9              | 27.1                            |
| Succinic acid                   | 1:2     | 2.622 ± 0.641  | 1.228 ± 0.133 | 0.9559         | 0.816      | 10             | 192.3              | 32.4                            |
| Succinic acid                   | 1:1     | 1.526 ± 0.835  | 1.085 ± 0.138 | 0.9692         | 0.865      | 6              | 192.3              | 32.4                            |
| Sulfadimidine                   | 1:1     | -3.267 ± 0.362 | 0.289 ± 0.091 | 0.7449         | 0.304      | 10             | 198.0              | 36.3                            |
| Theophylline                    | 1:1     | -0.526 ± 0.584 | 0.781 ± 0.153 | 0.9163         | 0.665      | 7              | 273.0              | 29.6                            |
| 4-OH-Benzoic Acid               | 1:1     | -1.556 ± 0.360 | 0.537 ± 0.087 | 0.9291         | 0.357      | 8              | 214.5              | 30.3                            |
| Benzamide                       | 1:1     | -0.699 ± 0.257 | 0.475 ± 0.060 | 0.9553         | 0.375      | 8              | 127.7              | 22.4                            |
| 2-OH-Benzamide                  | 1:1     | -1.350 ± 0.390 | 0.374 ± 0.089 | 0.8838         | 0.434      | 7              | 140.8              | 29.1                            |
| 4-NH <sub>2</sub> -Benzamide    | 1:1     | -1.596 ± 0.418 | 0.503 ± 0.115 | 0.8899         | 0.572      | 7              | 181.6              | 32.7                            |
| 4,4'-bipyridine                 | 1:2     | -1.024 ± 0.215 | 0.430 ± 0.047 | 0.9346         | 0.429      | 14             | 111.8              | 24.7                            |
| Pyrazinamide                    | 1:1     | -0.245 ± 0.191 | 0.341 ± 0.030 | 0.9885         | 0.220      | 5              | 190.0              | 28.1                            |
| Maleic Acid                     | 1:1     | 0.102 ± 0.380  | 0.733 ± 0.072 | 0.9811         | 0.482      | 6              | 135.0              | 26.9                            |
| Adipic acid                     | 1:1     | -0.465 ± 0.658 | 0.693 ± 0.109 | 0.9650         | 0.804      | 5              | 153.0              | 38.6                            |
| Meloxicam                       | 1:1     | -0.539 ± 0.289 | 0.594 ± 0.100 | 0.9032         | 0.395      | 10             | 254.0              | 49.9                            |
| L-proline                       | 1:1     | -1.102 ± 0.359 | 0.466 ± 0.087 | 0.8975         | 0.425      | 9              | 221.5              | 13.4                            |
| Sertraline                      | 1:1     | -0.176 ± 0.181 | 0.166 ± 0.044 | 0.8832         | 0.159      | 6              | not                | not                             |
| Curcumin                        | 1:1     | 0.013 ± 0.735  | 1.027 ± 0.155 | 0.9286         | 1.04       | 9              | 183.2              | 50.0                            |
| Etodolac                        | 1:1     | -2.739 ± 0.197 | 0.291 ± 0.091 | 0.9148         | 0.381      | 4              | 147.8              | 39.7                            |
| 4-OH-Benzamide                  | 2:1     | -1.441 ± 0.928 | 0.142 ± 0.135 | 0.5979         | 0.417      | 4              | 159.9              | 25.2                            |
| Diethylstilbestrol              | 1:2     | -0.738 ± 0.934 | 1.028 ± 0.412 | 0.8701         | 0.512      | 4              | 182.1              | 31.8                            |
| Tefagur                         | 1:1     | 0.093 ± 0.934  | 0.881 ± 0.276 | 0.9143         | 0.483      | 4              | 171.7              | 20.3                            |
| Gababentin lactam               | 1:1     | -0.231 ± 0.536 | 0.458 ± 0.141 | 0.9167         | 0.309      | 4              | 92.0               | 19.0                            |
| Flurbiprofen                    | 1:1     | -0.276 ± 0.501 | 0.749 ± 0.201 | 0.9347         | 0.227      | 4              | 109.3              | 28.9                            |

<sup>a</sup> Pair correlation coefficient;

<sup>b</sup> Standard deviation;

<sup>c</sup> Number of points in the cluster;

**Table S3.** Calculated,  $X_{id}^{CC} (Cal)$  [mol fr], and experimental,  $X_{id}^{CC} (Exp)$  [mol fr], values of the ideal intrinsic solubility of two-component molecular crystals with stoichiometry 1:1 and calculated,  $X_{Cal}^{CC}$  [mol fr], and experimental,  $X_{Exp}^{CC}$  [mol fr], values of co-crystals/salts solubility in the solvents at different temperatures

| CF1                | CF2                             | Solvent                | pH  | T [°C] | CF1 / CF2 <sup>a</sup>          | C <sup>b</sup> | D(slope) <sup>b</sup> | $\ln X_{id}^{CC} (Cal)$ <sup>c</sup> | $\ln X_{id}^{CC} (Exp)$ <sup>c</sup> | $X_{cal}^{CC}$ <sup>d</sup> | $X_{exp}^{CC}$ | Ref  |
|--------------------|---------------------------------|------------------------|-----|--------|---------------------------------|----------------|-----------------------|--------------------------------------|--------------------------------------|-----------------------------|----------------|------|
| Theophylline       | Nicotinamide                    | Buffer                 | 5.8 | 25.0   | Nicotinamide                    | -0.602         | 0.519                 | -3.42                                | -1.97                                | 1.60E-02                    | 8.61E-03       | [1]  |
| Carbamazepine      | Nicotinamide                    | Buffer                 | 6.0 | 25.0   | Nicotinamide                    | -0.602         | 0.519                 | -2.53                                | -3.48                                | 1.35E-03                    | 1.27E-03       | [1]  |
| Carbamazepine      | Saccharin                       | Buffer                 | 2.0 | 25.0   | Saccharin                       | -2.226         | 0.374                 | -3.71                                | -3.75                                | 6.23E-05                    | 2.13E-05       | [1]  |
| Carbamazepine      | Salicylic Acid                  | Buffer                 | 2.9 | 25.0   | Carbamazepine                   | -2.109         | 0.327                 | -3.23                                | -3.09                                | 3.21E-05                    | 1.63E-05       | [1]  |
| Benzamide          | dibenzyl sulfoxide              | Water                  |     | 37.0   | Benzamide                       | -0.699         | 0.475                 | -2.27                                | -2.65                                | 1.93E-04                    | 9.59E-05       | [2]  |
| Paracetamol        | Theophylline                    | Water                  |     | 37.0   | Theophylline                    | -0.526         | 0.781                 | -3.44                                | -2.40                                | 2.78E-03                    | 3.51E-03       | [3]  |
| Drug 1             | Benzoic Acid                    | 67THF-33H <sup>c</sup> |     | 25.0   | Benzoic Acid                    | 0.016          | 0.508                 | -3.02                                | -3.22                                | 2.89E-03                    | 3.73E-03       | [4]  |
| Gababentin lactam  | 4-NH <sub>2</sub> -Benzoic Acid | Buffer                 | 1.2 | 25.0   | 4-NH <sub>2</sub> -Benzoic Acid | -1.596         | 0.503                 | -2.31                                | -1.81                                | 9.70E-04                    | 5.22E-04       | [20] |
| Diflunisal         | Theophylline                    | Buffer                 | 7.4 | 25.0   | Theophylline                    | -0.526         | 0.781                 | -4.89                                | -4.34                                | 3.56E-04                    | 6.34E-04       | [5]  |
| Diclofenac         | Theophylline                    | Buffer                 | 7.4 | 25.0   | Theophylline                    | -0.526         | 0.781                 | -4.93                                | -5.01                                | 2.03E-04                    | 1.44E-04       | [5]  |
| Theophylline       | Salicylic Acid                  | Buffer                 | 2.6 | 25.0   | Salicylic Acid                  | -0.557         | 0.513                 | -3.34                                | -3.31                                | 5.47E-04                    | 2.28E-04       | [19] |
| Indomethacin       | Saccharin                       | MeOH                   |     | 25.0   | Saccharin                       | -2.226         | 0.374                 | -4.85                                | -5.45                                | 4.46E-03                    | 2.38E-03       | [7]  |
| Bicalutamide       | Benzamide                       | Chloroform             |     | 25.0   | Benzamide                       | -0.699         | 0.475                 | -4.22                                | -3.91                                | 2.88E-03                    | 1.52E-03       | [8]  |
| Bicalutamide       | Salicylamide                    | Chloroform             |     | 25.0   | Salicylamide                    | -1.350         | 0.374                 | -4.12                                | -4.51                                | 2.48E-03                    | 9.43E-04       | [8]  |
| Vanillin isoniazid | Saccharin                       | Water                  |     | 25.0   | Saccharin                       | -2.226         | 0.374                 | -5.29                                | -5.36                                | 3.49E-05                    | 1.51E-05       | [9]  |
| Salinazid          | Saccharin                       | Water                  |     | 25.0   | Saccharin                       | -2.226         | 0.374                 | -4.98                                | -4.78                                | 2.86E-05                    | 2.03E-05       | [9]  |
| Flurbiprofen       | Benzamide                       | Buffer                 | 2.0 | 25.0   | Benzamide                       | -0.699         | 0.475                 | -1.92                                | -2.23                                | 3.29E-05                    | 1.69E-05       | [13] |
| Flurbiprofen       | Picolinamide                    | Buffer                 | 2.0 | 25.0   | Flurbiprofen                    | -0.276         | 0.749                 | -1.55                                | -1.55                                | 8.78E-05                    | 5.76E-05       | [13] |
| Flurbiprofen       | Salicylamide                    | Buffer                 | 2.0 | 25.0   | Salicylamide                    | -1.350         | 0.374                 | -2.31                                | -2.75                                | 1.54E-05                    | 7.92E-06       | [13] |
| Flurbiprofen       | Salicylamide                    | Buffer                 | 6.8 | 25.0   | Salicylamide                    | -1.350         | 0.374                 | -2.31                                | -2.75                                | 2.03E-04                    | 1.19E-04       | [13] |
| Diclofenac         | L-proline                       | Buffer                 | 6.8 | 25.0   | L-Proline                       | -1.102         | 0.466                 | -3.73                                | -3.10                                | 3.14E-04                    | 5.23E-04       | [14] |
| Niflumic Acid      | L-proline                       | Buffer                 | 6.8 | 25.0   | L-Proline                       | -1.102         | 0.466                 | -3.67                                | -4.11                                | 2.62E-03                    | 8.99E-04       | [14] |
| Clonixin           | L-proline                       | Buffer                 | 6.8 | 25.0   | L-Proline                       | -1.102         | 0.466                 | -3.81                                | -4.01                                | 1.75E-03                    | 8.98E-04       | [14] |
| Fluconazole        | 4-OH-Benzoic Acid               | MeOH                   |     | 25.0   | 4-OH-Benzoic Acid               | -1.556         | 0.537                 | -3.66                                | -3.57                                | 3.91E-02                    | 1.93E-02       | [16] |
| Flurbiprofen       | Benzamide                       | Buffer                 | 6.8 | 25.0   | Benzamide                       | -0.699         | 0.475                 | -1.92                                | -2.23                                | 4.35E-04                    | 2.53E-04       | [13] |
| Flurbiprofen       | Picolinamide                    | Buffer                 | 6.8 | 25.0   | Flurbiprofen                    | -0.276         | 0.749                 | -1.55                                | -1.55                                | 1.16E-03                    | 5.61E-04       | [13] |
| Arbidol            | Benzoic Acid                    | EtOAc                  |     | 20.0   | Benzoic Acid                    | 0.016          | 0.508                 | -2.43                                | -3.13                                | 1.06E-02                    | 4.35E-03       | [18] |
| Indomethacin       | Saccharin                       | EtOH                   |     | 25.0   | Saccharin                       | -2.226         | 0.374                 | -4.04                                | -5.45                                | 5.50E-03                    | 2.31E-03       | [7]  |
| Theophylline       | Salicylic Acid                  | Acetonitrile           |     | 30.0   | Salicylic Acid                  | -0.557         | 0.513                 | -3.34                                | -3.31                                | 6.27E-03                    | 5.77E-03       | [19] |
| Carbamazepine      | Glutaric Acid                   | Isopropyl              |     | 25.0   | Carbamazepine                   | -2.109         | 0.327                 | -2.65                                | -2.37                                | 2.05E-02                    | 2.46E-02       | [1]  |
| Carbamazepine      | Glutaric Acid                   | EtOH                   |     | 25.0   | Carbamazepine                   | -2.109         | 0.327                 | -2.65                                | -2.37                                | 2.30E-02                    | 1.89E-02       | [1]  |
| Carbamazepine      | Glutaric Acid                   | EtOAc                  |     | 25.0   | Carbamazepine                   | -2.109         | 0.327                 | -2.65                                | -2.37                                | 1.14E-02                    | 9.31E-03       | [1]  |
| Theophylline       | Nicotinamide                    | Isopropyl              |     | 25.0   | Nicotinamide                    | -0.602         | 0.519                 | -3.42                                | -1.97                                | 2.94E-03                    | 3.69E-03       | [1]  |
| Theophylline       | Nicotinamide                    | EtOH                   |     | 25.0   | Nicotinamide                    | -0.602         | 0.519                 | -3.42                                | -1.97                                | 7.50E-03                    | 4.49E-03       | [1]  |
| Carbamazepine      | Nicotinamide                    | Isopropyl              |     | 25.0   | Carbamazepine                   | -2.109         | 0.327                 | -2.93                                | -3.48                                | 8.38E-03                    | 4.70E-03       | [1]  |
| Carbamazepine      | Nicotinamide                    | EtOH                   |     | 25.0   | Carbamazepine                   | -2.109         | 0.327                 | -2.93                                | -3.48                                | 1.47E-02                    | 8.88E-03       | [1]  |
| Carbamazepine      | Nicotinamide                    | EtOAc                  |     | 25.0   | Carbamazepine                   | -2.109         | 0.327                 | -2.93                                | -3.48                                | 4.31E-03                    | 2.54E-03       | [1]  |
| Carbamazepine      | Saccharin                       | Isopropyl              |     | 25.0   | Saccharin                       | -2.226         | 0.374                 | -3.61                                | -3.75                                | 2.62E-03                    | 1.52E-03       | [1]  |

|               |                      |                        |  |      |              |        |       |       |                 |          |          |      |
|---------------|----------------------|------------------------|--|------|--------------|--------|-------|-------|-----------------|----------|----------|------|
| Carbamazepine | Saccharin            | EtOAc                  |  | 25.0 | Saccharin    | -2.226 | 0.374 | -3.61 | -3.75           | 1.12E-02 | 4.92E-03 | [1]  |
| Drug 1        | Benzoic Acid         | 25THF-75H <sup>f</sup> |  | 25.0 | Benzoic Acid | 0.016  | 0.508 | -3.02 | -3.22           | 2.29E-02 | 3.55E-02 | [4]  |
| Bicalutamide  | Benzamide            | Chloroform             |  | 18.0 | Benzamide    | -0.699 | 0.475 | -4.46 | -3.91           | 2.59E-03 | 1.12E-03 | [8]  |
| Bicalutamide  | Benzamide            | Chloroform             |  | 22.0 | Benzamide    | -0.699 | 0.475 | -4.32 | -3.91           | 2.77E-03 | 1.34E-03 | [8]  |
| Bicalutamide  | Benzamide            | Chloroform             |  | 30.0 | Benzamide    | -0.699 | 0.475 | -4.06 | -3.91           | 3.03E-03 | 3.03E-03 | [8]  |
| Bicalutamide  | Salicylamide         | Chloroform             |  | 22.0 | Salicylamide | -1.350 | 0.374 | -4.20 | -4.51           | 2.47E-03 | 8.71E-04 | [8]  |
| Bicalutamide  | Salicylamide         | Chloroform             |  | 30.0 | Salicylamide | -1.350 | 0.374 | -4.00 | -4.51           | 2.56E-03 | 1.15E-03 | [8]  |
| Arbidol       | Benzoic Acid         | EtOAc                  |  | 25.0 | Benzoic Acid | 0.016  | 0.508 | -2.28 | -3.13           | 1.21E-02 | 5.54E-03 | [18] |
| Arbidol       | Benzoic Acid         | EtOAc                  |  | 30.0 | Benzoic Acid | 0.016  | 0.508 | -2.13 | -3.13           | 1.38E-02 | 7.05E-03 | [18] |
| Arbidol       | Benzoic Acid         | EtOAc                  |  | 35.0 | Benzoic Acid | 0.016  | 0.508 | -1.98 | -3.13           | 1.58E-02 | 9.29E-03 | [18] |
| Theophylline  | Acetylsalicylic Acid | Isopropyl              |  | 20.0 | Theophylline | -0.526 | 0.781 | -3.34 | nd <sup>g</sup> | 1.18E-02 | 1.30E-02 | [21] |
| Theophylline  | Acetylsalicylic Acid | Isopropyl              |  | 40.0 | Theophylline | -0.526 | 0.781 | -3.34 | nd <sup>g</sup> | 2.73E-02 | 3.12E-02 | [21] |

<sup>a</sup>Co-former for which it was obtained the correlation Eq (6) for calculation of  $\ln X_{id}^{CC}(Cal)$  [22];

<sup>b</sup>Coefficients of Eq. (6);

<sup>c</sup> $\ln X_{id}^{CC}(Cal)$  and  $\ln X_{id}^{CC}(Exp)$  calculated with account for  $\Delta H_{fus}(CC) = Q \cdot MW(CC) = Q \cdot [MW_1 \cdot (m/(m+l)) + MW_2 \cdot (l/(m+l))]$

where MW(CC), MW<sub>1</sub> and MW<sub>2</sub> are molecular weights of the co-crystal, CF1, and CF2, respectively. Q [J/g] is a fusion heat effect. (CF1:CF2) is stoichiometry (l:m). In this case (stoichiometry 1:1), therefore in order to evaluate  $X_{cal}^{CC}$  and  $X_{exp}^{CC}$  the values of  $\ln X_{id}^{CC}(Cal)$  and  $\ln X_{id}^{CC}(Exp)$  should be multiplied in 2.

<sup>d</sup>Calculated by using  $\ln X_{id}^{CC}(Cal)$  -values evaluated by Eq.(6)

<sup>e</sup>67THF-33H - 67%(V/V) THF +33% Heptane

<sup>f</sup>25THF-75H - 25%(V/V) THF +75% Heptane

<sup>g</sup>nd is not described in the paper;

## References

- [1] D. J. Good and N. Rodríguez-Hornedo, *Cryst. Growth Des.*, 2009, **9**(5), 2252-2264.
- [2] C. Grossjohann, K. S. Eccles, A. R. Maguire, S. E. Lawrence, L. Tajber, O. I. Corrigan, A. M. Healy, *Int. J. Pharm.*, 2012, **422**, 24-32.
- [3] H.-G. Lee, G. G. Z. Zhang, D. R. Flanagan, *J. Pharm. Sci.*, 2011, **100**(5), 1736-744.
- [4] D. H. Leung, S. Lohani, R. G. Ball, N. Canfield, Y. Wang, T. Rhodes, A. Bak, *Cryst. Growth Des.*, 2012, **12**, 1254-1262.
- [5] A. O. Surov, A. P. Voronin, A. N. Manin, N. G. Manin, L. G. Kuzmina, A. V. Churakov, G. L. Perlovich, *Mol. Pharm.*, 2014, **11**(10), 3707-3715.
- [6] S. Zhang, H. Chen, Å. C. Rasmuson, *CrystEngComm*, 2015, **17**, 4125-4135.
- [7] V. Ferretti, A. Dalpiaz, V. Bertolasi, L. Ferraro, S. Beggiato, F. Spizzo, E. Spisni, B. Pavan, *Mol. Pharm.*, 2015, **12**(5), 1501-1511.
- [8] A. O. Surov, K. A. Solanko, A. D. Bond, A. Bauer-Brandl, G.L. Perlovich, *CrystEngComm*, 2016, **18**(25), 4818-4829.
- [9] A. O. Surov, A. P. Voronin, A. A. Simagina, A. V. Churakov, S. Y. Skachilova, G. L. Perlovich, *New J. Chem.*, 2015, **39**(11), 8614-8622.
- [10] A. O. Surov, T. V. Volkova, A. V. Churakov, A. N. Proshin, I. V. Terekhova, G. L. Perlovich, *Eur. J. Pharm. Sci.*, 2017, **109**, 31-39.
- [11] T. O. Dabir, V. G. Gaikar, S. Jayaraman, S. Mukherjee, *Fluid Phase Equilibrium*, 2018, **456**, 65-76.
- [12] K. L. Yeh and T. Lee, *Cryst. Growth Des.*, 2018, **18**(3), 1339-1349.
- [13] A. O. Surov, A. N. Manin, A. P. Voronin, D. Boycov, O. Magdysyuk, G. L. Perlovich, *Cryst. Growth Des.*, 2019, **19**, 5751-5761.
- [14] A. O. Surov, A. P. Voronin, M. V. Vener, A. V. Churakov, G. L. Perlovich, *CrystEngComm*, 2018, **20**, 6970-6981.
- [15] N. Suzuki, M. Kawahata, K. Yamaguchi, T. Suzuki, K. Tomono, T. Fukami, *Drug Development and Industrial Pharmacy*, 2018, **44**(4), 582-589.
- [16] A. O. Surov, A. P. Voronin, N. A. Vasilev, A. V. Churakov, G. L. Perlovich *Cryst. Growth Des.*, 2020, **20**(2), 1218-1228.
- [17] D. Ahuja, M. Svärd, M. Lusi, Å. C. Rasmuson, *CrystEngComm*, 2020, 3463-3473.
- [18] A. O. Surov, A. N. Manin, A. V. Churakov, G. L. Perlovich, *Mol. Pharm.*, 2015, **12**, 4154-4165.
- [19] S. Nicoli, S. Bilzi, P. Santi, M. R. Caira, J. Le, R. Bettini, *J. Pharm. Res.*, 2008, **97**, 4830-4839.
- [20] C. Maheshwari, V. Andre, S. Reddy, L. Roy, T. Duarte, N. Rodríguez-Hornedo, *CrystEngComm*, 2012, **14**, 4801-4811.
- [21] S. Darwish, J. Zeglinski, R. K. Gamidi, R. Shaikh, M. Khraisheh, G. M. Walker, D. M. Croker *Cryst. Growth Des.*, 2018, 7526.
- [22] G. L. Perlovich, *Cryst. Growth Des.*, 2021, **21**(9), 5058-5071.
